# Supplementary figures and images for: Identification of novel bacterial urease inhibitors through molecular shape and structure based virtual screening approaches
Source: PubMed Central journal article supplement — RSC Adv. 2020 Apr 22;10(27):16061–70. doi: 10.1039/d0ra02363a (PMC9052855; doi:10.1039/d0ra02363a), 2020-04-22

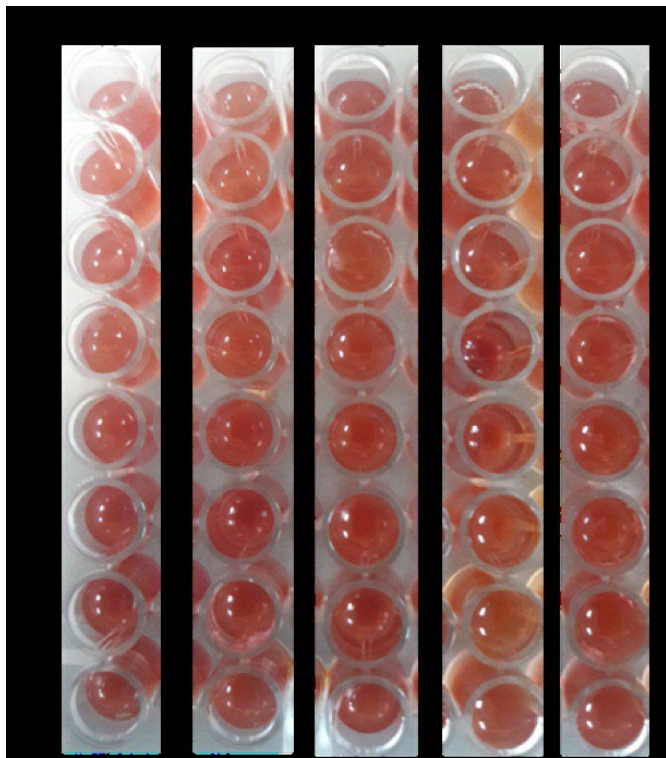

Supplement: RA-010-D0RA02363A-s001.pdf [file RA-010-D0RA02363A-s001.pdf]
